# Supplementary material for: Blockade of AMPK-Mediated cAMP–PKA–CREB/ATF1 Signaling Synergizes with Aspirin to Inhibit Hepatocellular Carcinoma
Source: MDPI journal article supplement (doi:10.3390/cancers13071738), 2021-04-06

Original Western Blots

Figure 1a

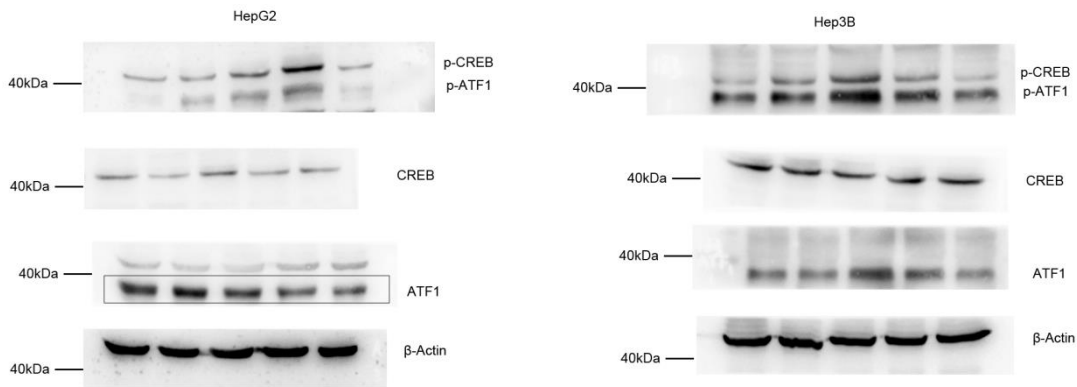

Figure 1b

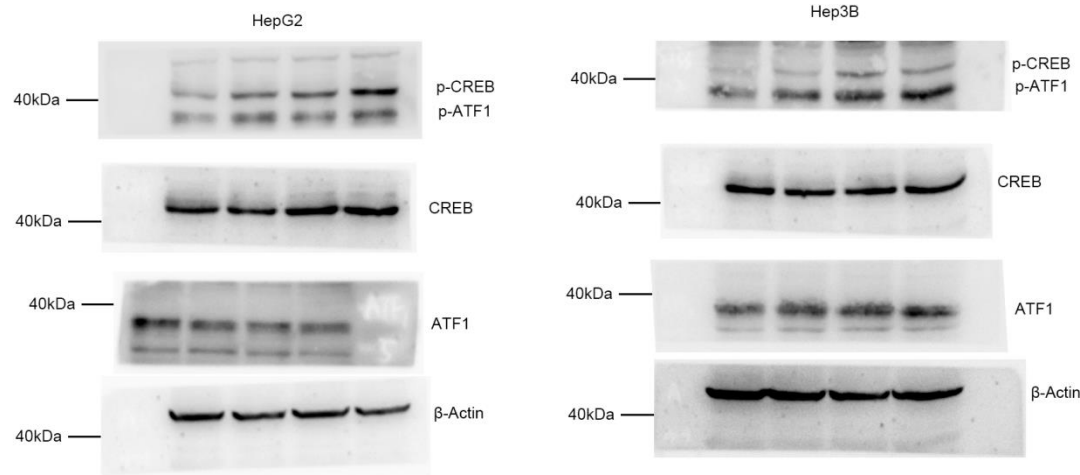

Figure 1c

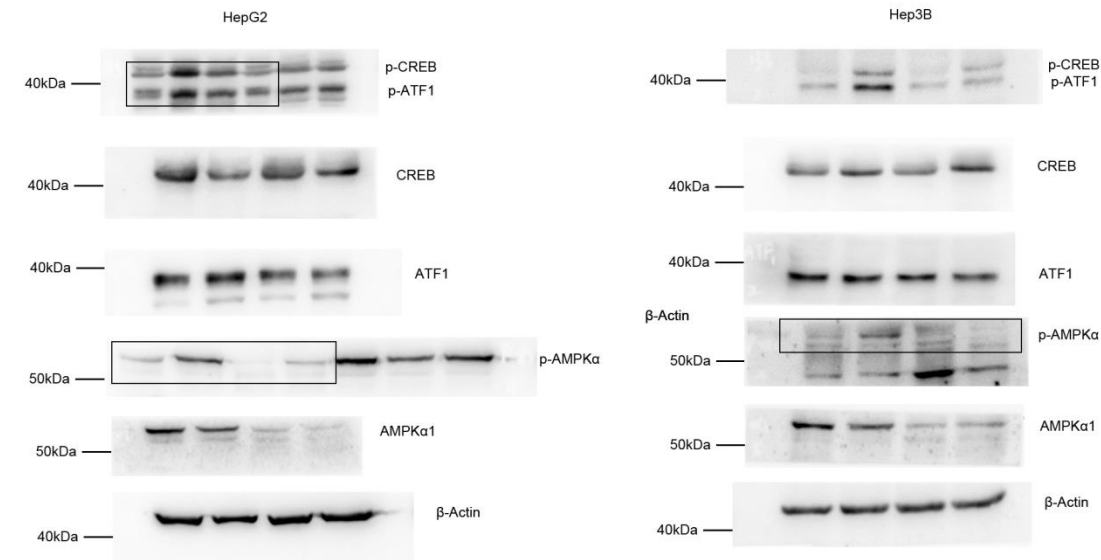

**Figure 2a**

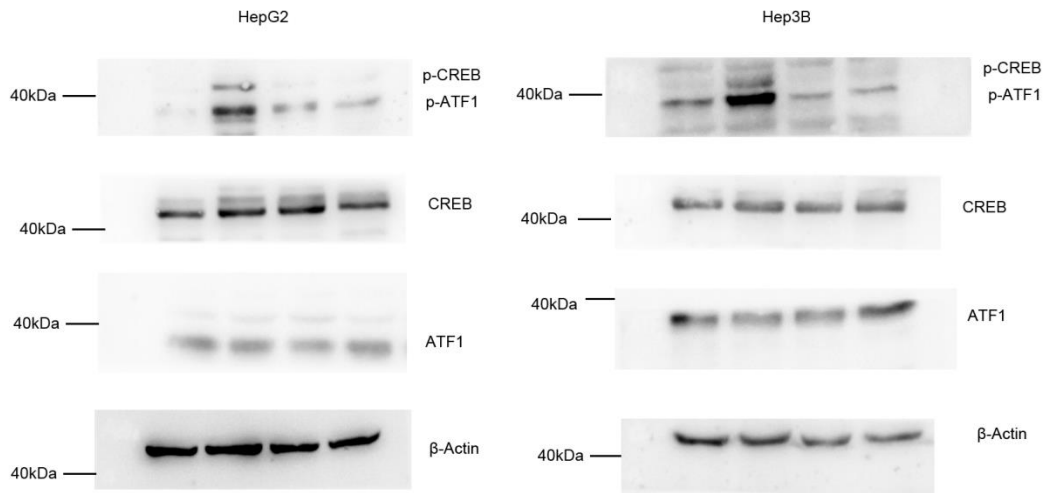

**Figure 2f**

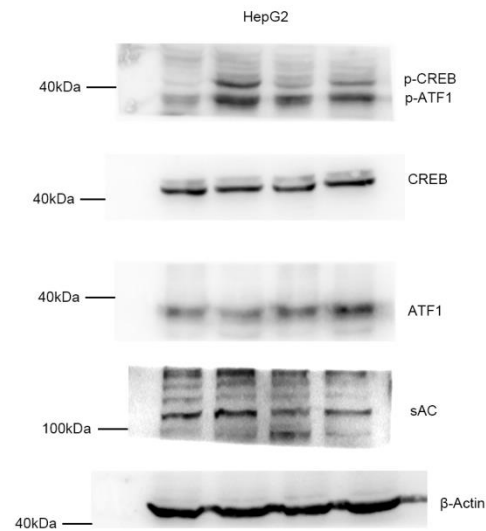

**Figure 3a**

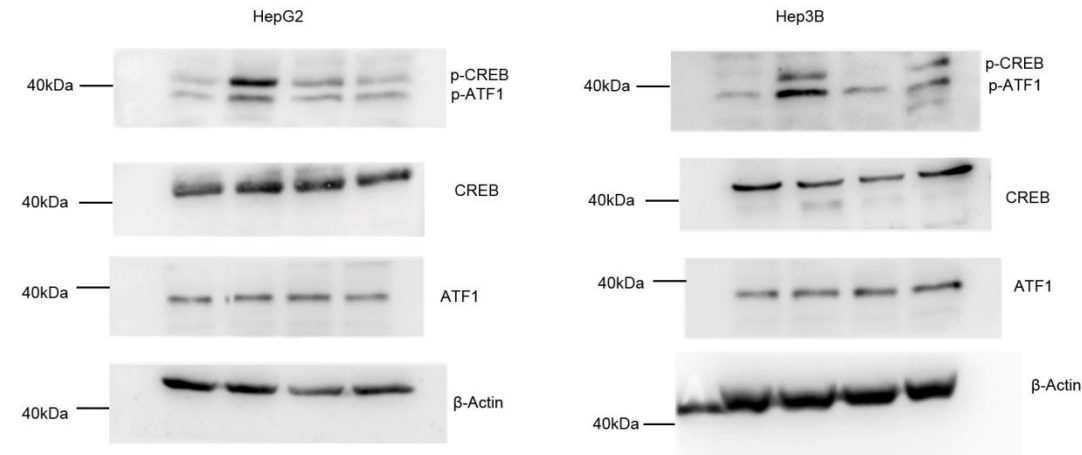

**Figure 3c**

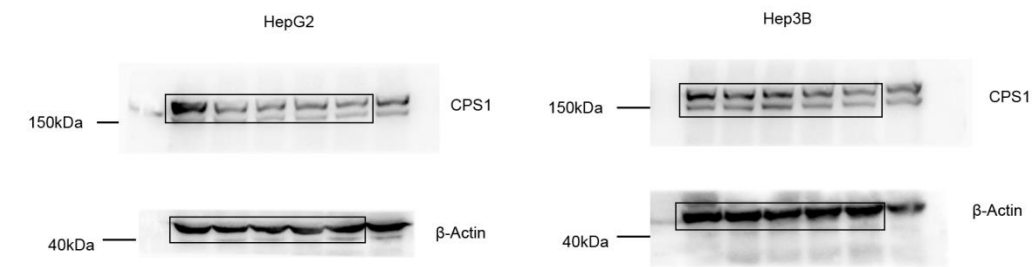

**Figure 3d**

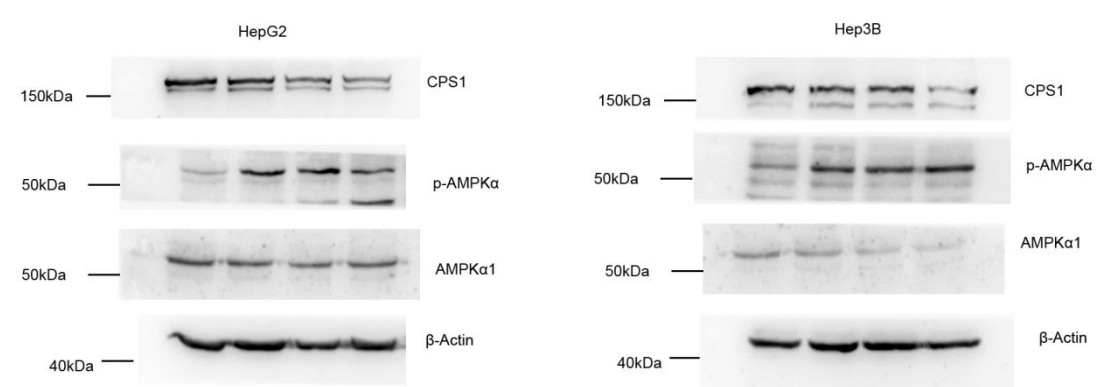

**Figure 3e**

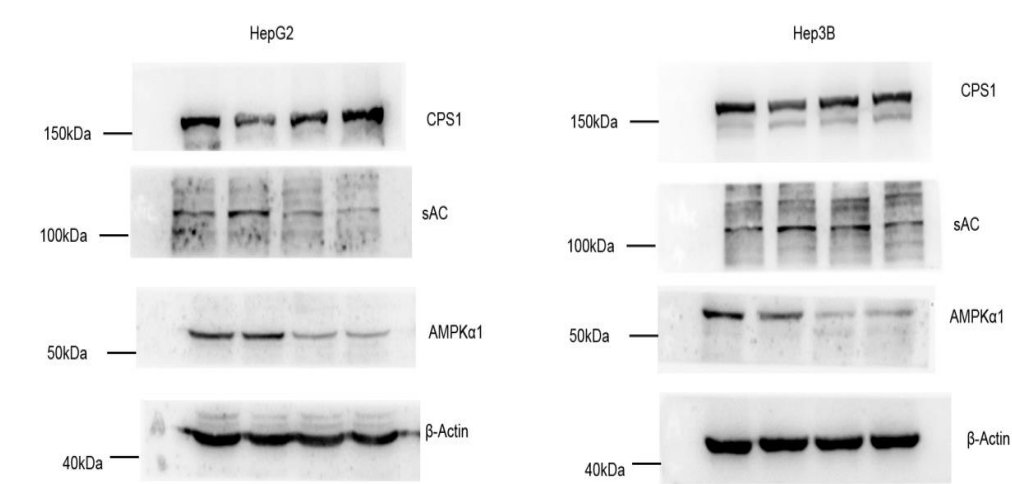

Figure 3f

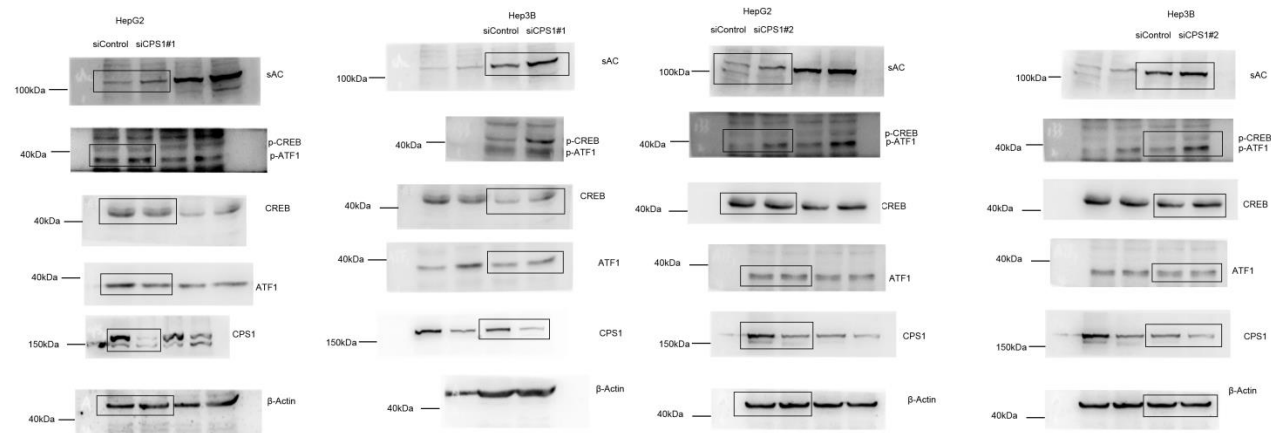

Figure 4a

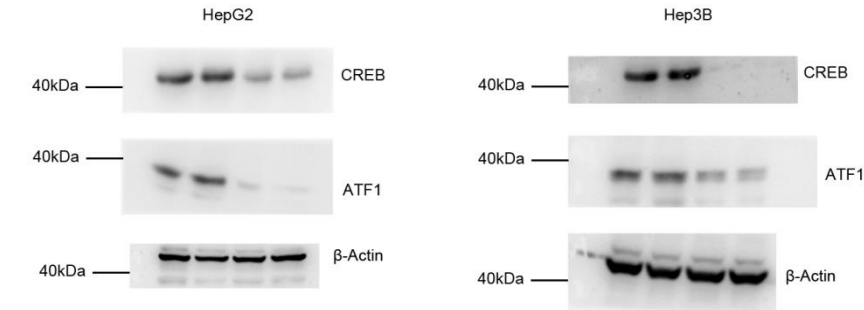

Figure 5b

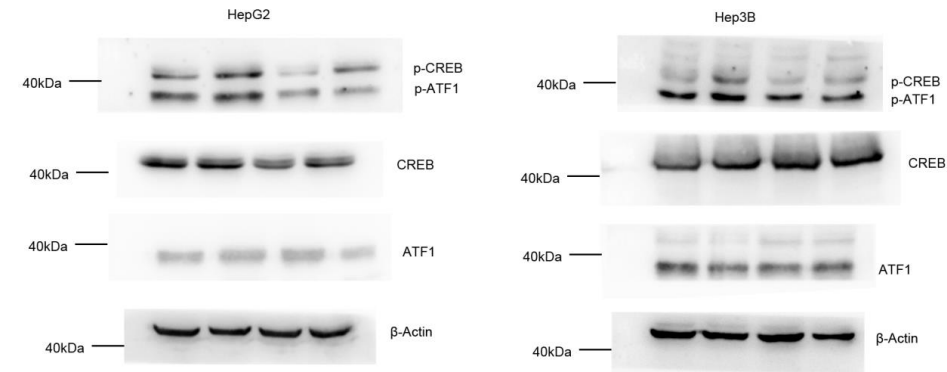

**Figure 6a**

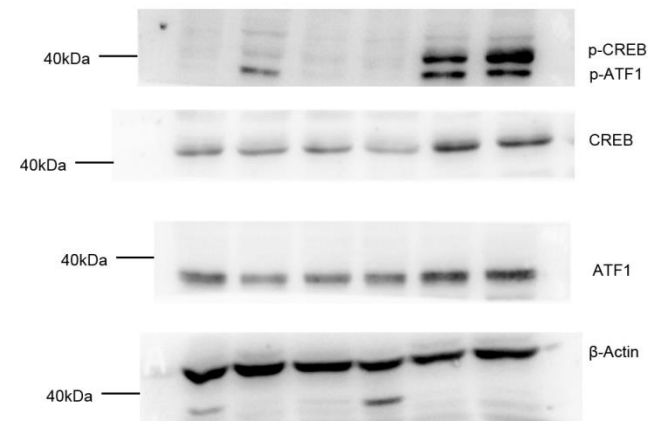

**Figure 6b**

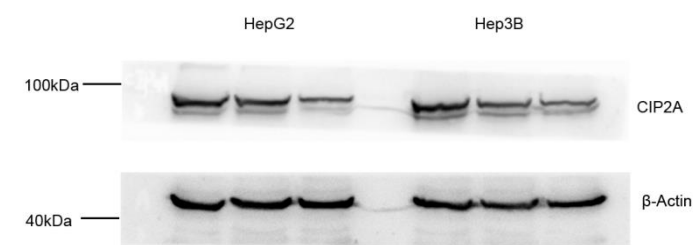

**Figure 6c**

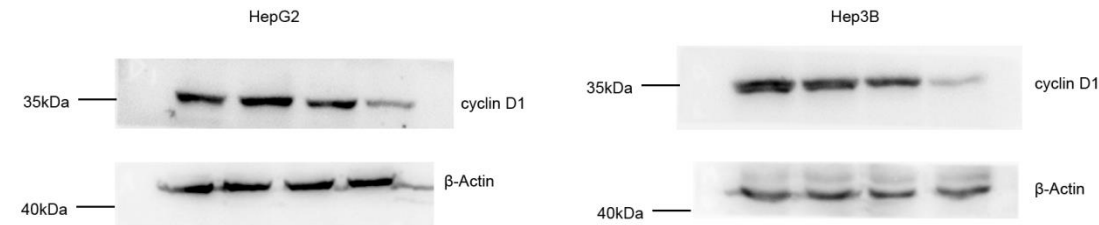

**Figure 6d**

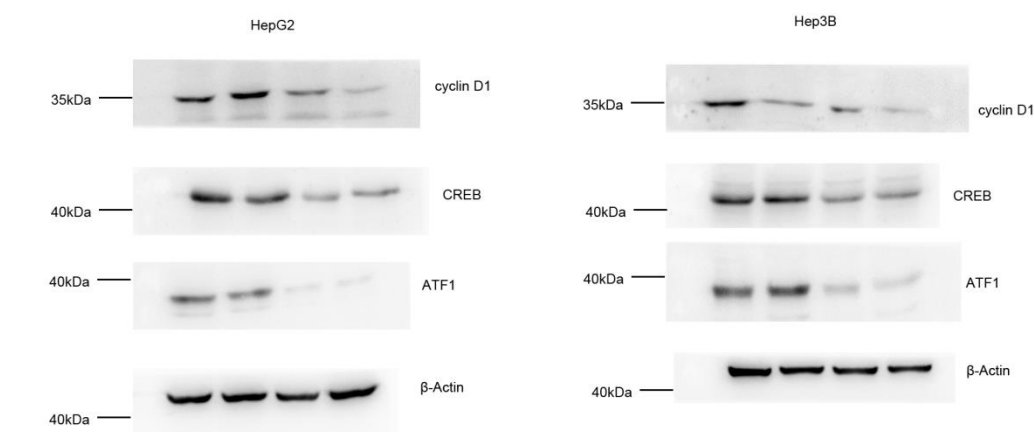

**Figure S1**

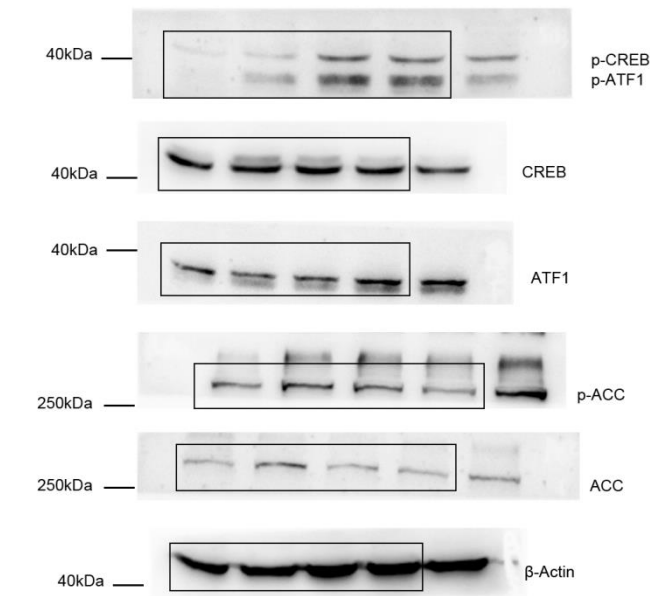

**Figure S3**

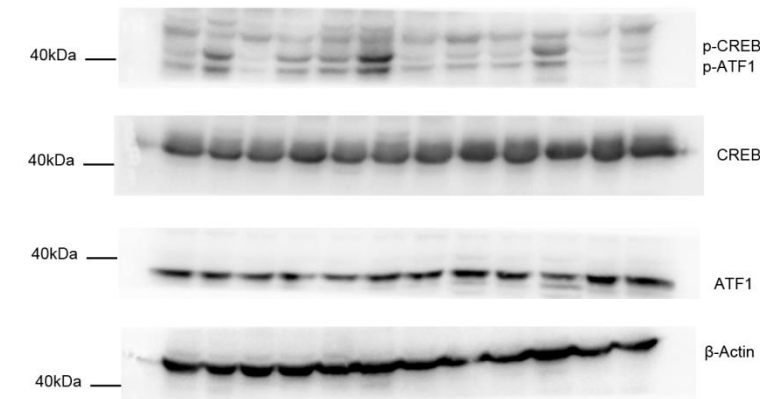

**Figure S4**

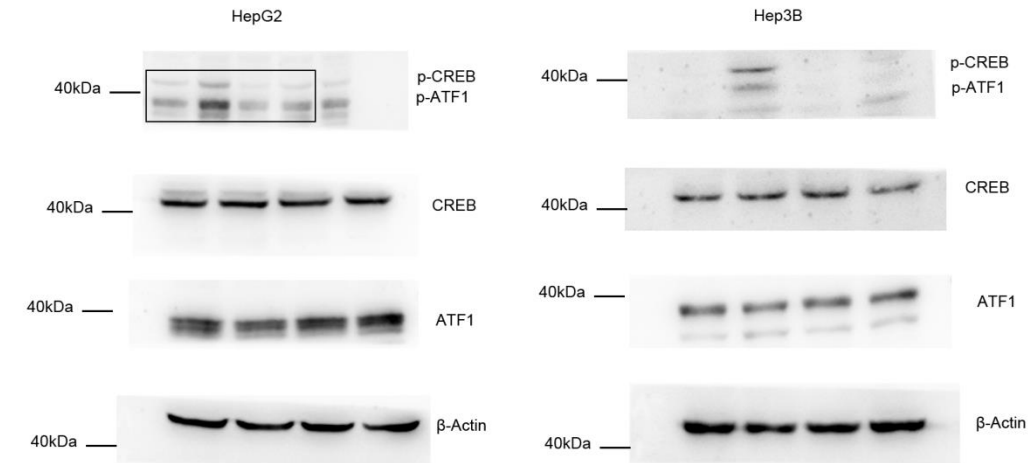

**Figure S6**

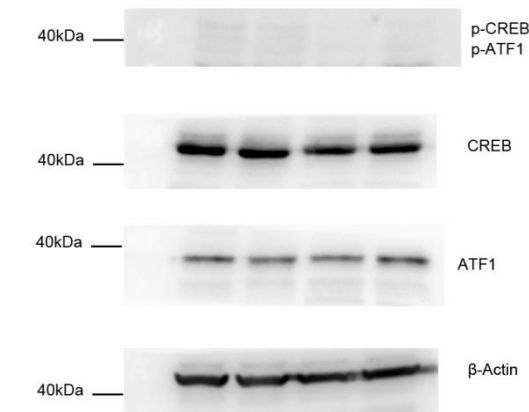

**Figure S7**

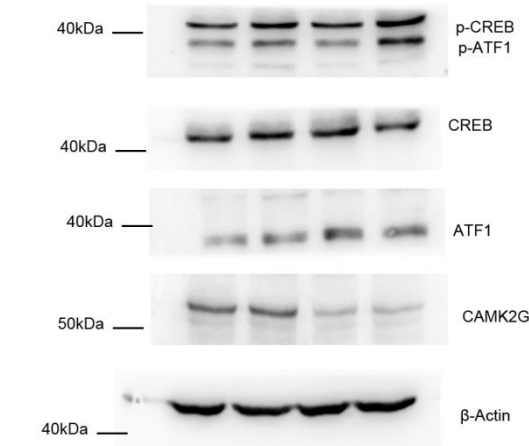

**Figure S10**

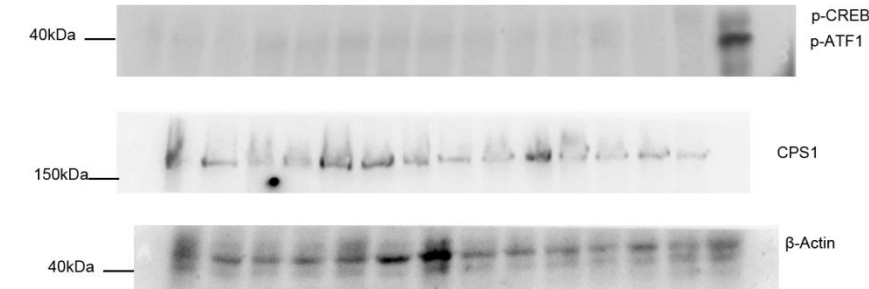

Supplement: s1 [file s1]
